# Supplementary material for: MRI‐based strain measurements reflect morphological changes following myocardial infarction: A study on the UK Biobank cohort
Source: PubMed Central journal article supplement (PMC9773168; doi:10.1111/joa.13787), 2022-12-09
Supplement: JOA-242-102-s004.pdf [file JOA-242-102-s004.pdf]

## Online Supplementary Materials

Table 1: Results from Student's t-test for all males vs. all females, as well as all healthy vs. all unhealthy participants. All results were statistically significant.

| Variable | All Males vs All Females<br><i>p</i> -values | All Healthy vs All Unhealthy<br><i>p</i> -values |
|----------|----------------------------------------------|--------------------------------------------------|
| ESV      | 0.001                                        | 0.001                                            |
| EDV      | 0.001                                        | 0.001                                            |
| LVEF     | 0.001                                        | 0.001                                            |
| ESVi     | 0.001                                        | 0.001                                            |
| BSA      | 0.001                                        | 0.005                                            |
| ACS      | 0.002                                        | 0.006                                            |
| MCS      | 0.003                                        | 0.001                                            |
| BCS      | 0.001                                        | 0.001                                            |
| GCS      | 0.001                                        | 0.001                                            |

Table 2: Further data for the Student's t-test for all male vs. all female volunteers. Where the Variance *p*-value is less than 0.05, the data shown assumes that the variances between the groups was not equal.

| Variables | Variance<br><i>p</i> -value | Mean<br>Difference | Std. Error<br>Difference | 95% Confidence<br>Interval of the<br>Difference |       |
|-----------|-----------------------------|--------------------|--------------------------|-------------------------------------------------|-------|
|           |                             |                    |                          | Lower                                           | Upper |
| ESV       | 0                           | -22.5              | 1.3                      | -25.2                                           | -19.9 |
| EDV       | 0                           | -38.9              | 2.1                      | -43.0                                           | -34.9 |
| LVEF      | 0.002                       | 3.3                | 0.5                      | 2.4                                             | 4.2   |
| ESVi      | 0                           | -7.3               | 0.7                      | -8.7                                            | -6.0  |
| BSA       | 0.06                        | -0.3               | 0.01                     | -0.3                                            | -0.2  |
| ACS       | 0.03                        | -2.1               | 0.7                      | -3.4                                            | -0.8  |
| MCS       | 0                           | -1.1               | 0.4                      | -1.8                                            | -0.4  |
| BCS       | 0.2                         | -2.6               | 0.4                      | -3.4                                            | -1.8  |
| GCS       | 0.001                       | -1.8               | 0.4                      | -2.6                                            | -1.1  |

Table 3: Further data for the Student's t-test for all healthy vs. all unhealthy volunteers. Where the Variance  $p$ -value is less than 0.05, the data shown assumes that the variances between the groups was not equal.

| Variables | Variance<br>$p$ -value | Mean<br>Difference | Std. Error<br>Difference | 95% Confidence<br>Interval of the<br>Difference |       |
|-----------|------------------------|--------------------|--------------------------|-------------------------------------------------|-------|
|           |                        |                    |                          | Lower                                           | Upper |
| ESV       | 0                      | -17.9              | 2.8                      | -23.4                                           | -12.4 |
| EDV       | 0.07                   | -18.3              | 3.3                      | -24.9                                           | -11.8 |
| LVEF      | 0                      | 5.4                | 0.8                      | 3.9                                             | 6.9   |
| ESVi      | 0                      | -8.7               | 1.4                      | -11.4                                           | -6.0  |
| BSA       | 0.003                  | -0.05              | 0.02                     | -0.08                                           | -0.01 |
| ACS       | 0                      | -3.5               | 1.2                      | -5.9                                            | -1.0  |
| MCS       | 0                      | -2.1               | 0.6                      | -3.4                                            | -0.9  |
| BCS       | 0                      | -2.3               | 0.7                      | -3.7                                            | -1.0  |
| GCS       | 0                      | -2.8               | 0.7                      | -4.2                                            | -1.4  |

Table 4: Results from the initial one-way ANOVAs. All  $p$ -values were less than the required 0.05.

| ANOVA | $p$ -value |
|-------|------------|
| ESV   | 0.001      |
| EDV   | 0.001      |
| LVEF  | 0.001      |
| ESVi  | 0.001      |
| BSA   | 0.001      |
| ACS   | 0.019      |
| MCS   | 0.001      |
| BCS   | 0.001      |
| GCS   | 0.001      |

Table 5: Baseline characteristics for healthy females of all ages.

| Measure           | $n$ | Mean   | Median | St. Dev. | Lower 95% CI | Upper 95% CI |
|-------------------|-----|--------|--------|----------|--------------|--------------|
| BMI ( $kg/m^2$ )  | 281 | 24.53  | 24.38  | 2.78     | 24.2         | 24.86        |
| HR (bpm)          | 260 | 62.09  | 61     | 9.22     | 60.95        | 63.23        |
| Weight (kg)       | 281 | 65.51  | 64.7   | 8.34     | 64.51        | 66.51        |
| Age (years)       | 281 | 60.17  | 61     | 7.58     | 59.27        | 61.07        |
| ESV (mL)          | 260 | 52.92  | 52     | 11.6     | 51.49        | 54.35        |
| EDV (mL)          | 260 | 124.2  | 124    | 21.2     | 121.5        | 126.8        |
| LVEF (%)          | 260 | 57.42  | 58     | 4.91     | 56.81        | 58.03        |
| ESVi ( $mL/m^2$ ) | 260 | 31.01  | 30.09  | 6.4      | 30.22        | 31.8         |
| BSA ( $m^2$ )     | 260 | 1.71   | 1.7    | 0.12     | 1.7          | 1.72         |
| ACS (%)           | 281 | -42.43 | -42.17 | 7.68     | -43.35       | -41.51       |
| MCS (%)           | 281 | -29.68 | -29.74 | 3.9      | -30.15       | -29.21       |
| BCS (%)           | 281 | -32.8  | -32.42 | 5.01     | -33.4        | -32.2        |
| GCS (%)           | 281 | -34.29 | -34.4  | 4.09     | -34.78       | -33.8        |

Table 6: Baseline characteristics for unhealthy females of all ages.

| Measure           | $n$ | Mean   | Median | St. Dev. | Lower 95% CI | Upper 95% CI |
|-------------------|-----|--------|--------|----------|--------------|--------------|
| BMI ( $kg/m^2$ )  | 20  | 24.85  | 24.73  | 2.84     | 23.58        | 26.12        |
| HR (bpm)          | 18  | 61.56  | 58     | 10.9     | 56.43        | 66.69        |
| Weight (kg)       | 20  | 63.6   | 64.25  | 7.28     | 60.34        | 66.86        |
| Age (years)       | 20  | 66.85  | 68.5   | 5.03     | 64.6         | 69.1         |
| ESV (mL)          | 18  | 58.11  | 57     | 17.7     | 49.75        | 66.47        |
| EDV (mL)          | 18  | 126.6  | 129    | 24       | 115.3        | 137.9        |
| LVEF (%)          | 18  | 54.56  | 56     | 8.18     | 50.7         | 58.42        |
| ESVi ( $mL/m^2$ ) | 18  | 34.66  | 34.13  | 10.5     | 29.73        | 39.59        |
| BSA ( $m^2$ )     | 18  | 1.67   | 1.69   | 0.1      | 1.62         | 1.72         |
| ACS (%)           | 20  | -39.97 | -42.74 | 13.9     | -46.18       | -33.76       |
| MCS (%)           | 20  | -27.98 | -29.15 | 5.44     | -30.41       | -25.55       |
| BCS (%)           | 20  | -30.94 | -30.64 | 7.16     | -34.14       | -27.74       |
| GCS (%)           | 20  | -32.13 | -33.26 | 7.65     | -35.55       | -28.71       |

Table 7: Baseline characteristics for healthy males of all ages.

| Measure           | $n$ | Mean   | Median | St. Dev. | Lower 95% CI | Upper 95% CI |
|-------------------|-----|--------|--------|----------|--------------|--------------|
| BMI ( $kg/m^2$ )  | 293 | 25.65  | 25.9   | 2.42     | 25.37        | 25.93        |
| HR (bpm)          | 274 | 60.32  | 60     | 8.86     | 59.25        | 61.39        |
| Weight (kg)       | 293 | 80.45  | 80.4   | 9.5      | 79.34        | 81.56        |
| Age (years)       | 293 | 60.35  | 60     | 7.87     | 59.43        | 61.27        |
| ESV (mL)          | 274 | 72.4   | 70     | 16.8     | 70.37        | 74.43        |
| EDV (mL)          | 274 | 161.4  | 159    | 29       | 157.9        | 165          |
| LVEF (%)          | 274 | 55.3   | 56     | 5.59     | 54.62        | 55.98        |
| ESVi ( $mL/m^2$ ) | 274 | 36.56  | 35.98  | 7.85     | 35.61        | 37.51        |
| BSA ( $m^2$ )     | 274 | 1.98   | 1.97   | 0.14     | 1.96         | 2            |
| ACS (%)           | 293 | -41.08 | -40.86 | 7.9      | -42          | -40.16       |
| MCS (%)           | 293 | -29.08 | -28.67 | 4.35     | -29.59       | -28.57       |
| BCS (%)           | 293 | -30.53 | -30.73 | 3.89     | -30.98       | -30.08       |
| GCS (%)           | 293 | -32.99 | -32.99 | 4.44     | -33.51       | -32.47       |

Table 8: Baseline characteristics for unhealthy males of all ages.

| Measure           | $n$ | Mean   | Median | St. Dev. | Lower 95% CI | Upper 95% CI |
|-------------------|-----|--------|--------|----------|--------------|--------------|
| BMI ( $kg/m^2$ )  | 111 | 25.68  | 25.78  | 2.28     | 25.25        | 26.11        |
| HR (bpm)          | 101 | 56.02  | 54     | 9.04     | 54.22        | 57.82        |
| Weight (kg)       | 111 | 78.19  | 78.3   | 8.65     | 76.55        | 79.83        |
| Age (years)       | 111 | 66.8   | 68     | 5.36     | 65.78        | 67.82        |
| ESV (mL)          | 101 | 84.88  | 78     | 28.8     | 79.14        | 90.62        |
| EDV (mL)          | 101 | 167.9  | 161    | 37       | 160.5        | 175.2        |
| LVEF (%)          | 101 | 50.25  | 51     | 7.68     | 48.72        | 51.78        |
| ESVi ( $mL/m^2$ ) | 101 | 44     | 40.51  | 14.8     | 41.06        | 46.94        |
| BSA ( $m^2$ )     | 101 | 1.93   | 1.93   | 0.13     | 1.9          | 1.96         |
| ACS (%)           | 111 | -37.97 | -41.54 | 13.8     | -40.6        | -35.34       |
| MCS (%)           | 111 | -27.1  | -27.81 | 7.4      | -28.5        | -25.7        |
| BCS (%)           | 111 | -29    | -28.28 | 7.45     | -30.41       | -27.59       |
| GCS (%)           | 111 | -30.61 | -32.14 | 7.75     | -32.08       | -29.14       |

Table 9: Mean time in years since initial cardiac event. \* There was only one participant in this group.

| Unhealthy Group | Mean time (years) |
|-----------------|-------------------|
| Females 45-54   | 14.7*             |
| Females 55-64   | 2.8               |
| Females 65-74   | 4.3               |
| Males 45-54     | 4.6               |
| Males 55-64     | 5.9               |
| Males 65-74     | 7.7               |

Table 12: Age and BSA correlations with other variables of interest for all healthy females. Statistically significant  $p$ -values are highlighted in green. The 95% CIs are taken from the bootstrapping analysis.

| Variable | Age Correlations |         |            |         |        |
|----------|------------------|---------|------------|---------|--------|
|          | $n$              | Pearson | $p$ -value | 95% CIs |        |
|          |                  |         |            | Lower   | Upper  |
| EDV      | 260              | -0.193  | 0.002      | -0.303  | -0.069 |
| ESV      | 260              | -0.120  | 0.054      | -0.243  | -0.003 |
| LVEF     | 260              | -0.059  | 0.344      | -0.189  | 0.068  |
| ESVi     | 260              | -0.120  | 0.054      | -0.242  | 0.008  |
| ACS      | 281              | 0.046   | 0.442      | -0.089  | 0.175  |
| MCS      | 281              | -0.163  | 0.006      | -0.272  | -0.029 |
| BCS      | 281              | -0.006  | 0.918      | -0.114  | 0.134  |
| GCS      | 281              | -0.041  | 0.490      | -0.156  | 0.090  |
| Variable | BSA Correlations |         |            |         |        |
| EDV      | 260              | 0.443   | 0.000      | 0.341   | 0.542  |
| ESV      | 260              | 0.318   | 0.000      | 0.202   | 0.425  |
| LVEF     | 260              | 0.065   | 0.300      | -0.070  | 0.190  |
| ESVi     | 260              | -0.017  | 0.786      | -0.137  | 0.109  |
| ACS      | 260              | -0.046  | 0.459      | -0.165  | 0.074  |
| MCS      | 260              | -0.063  | 0.308      | -0.208  | 0.071  |
| BCS      | 260              | 0.054   | 0.384      | -0.065  | 0.153  |
| GCS      | 260              | -0.007  | 0.917      | -0.136  | 0.117  |

Table 10:  $P$ -values for all strain and strain rate metrics. Results highlighted in green with bold text and \* indicates results which are statistically significant to  $p \leq 0.003$ .

| Planned Comparison                              | ACS   | MCS           | BCS           | GCS           |
|-------------------------------------------------|-------|---------------|---------------|---------------|
| Female Healthy 45-54 vs. Female Healthy 55-64   | 0.556 | 0.041         | 0.462         | 0.439         |
| Female Healthy 45-54 vs. Female Healthy 65-74   | 0.816 | <b>0.002*</b> | 0.785         | 0.226         |
| Female Healthy 55-64 vs. Female Healthy 65-74   | 0.412 | 0.272         | 0.245         | 0.669         |
| Female Healthy 45-54 vs. Male Healthy 45-54     | 0.321 | 0.569         | <b>0.001*</b> | 0.066         |
| Female Healthy 55-64 vs. Male Healthy 55-64     | 0.078 | 0.376         | 0.004         | 0.051         |
| Female Healthy 65-74 vs. Male Healthy 65-74     | 0.449 | 0.153         | <b>0.001*</b> | 0.015         |
| Male Healthy 45-54 vs. Male Healthy 55-64       | 0.839 | 0.098         | 0.505         | 0.682         |
| Male Healthy 45-54 vs. Male Healthy 65-74       | 0.969 | 0.069         | 0.709         | 0.824         |
| Male Healthy 55-64 vs. Male Healthy 65-74       | 0.860 | 0.763         | 0.762         | 0.865         |
| Male Healthy 65-74 vs. Male Unhealthy 65-74     | 0.033 | <b>0.001*</b> | 0.118         | 0.01          |
| Female Healthy 65-74 vs. Female Unhealthy 65-74 | 0.725 | 0.145         | 0.266         | 0.311         |
| Male Healthy 55-64 vs. Male Unhealthy 55-64     | 0.790 | 0.563         | 0.147         | 0.303         |
| Male Unhealthy 55-64 vs. Male Unhealthy 65-74   | 0.436 | 0.369         | 0.857         | 0.569         |
| All Males Healthy vs. All Females Healthy       | 0.060 | 0.061         | <b>0.001*</b> | <b>0.001*</b> |
| All Females Healthy vs. All Females Unhealthy   | 0.437 | 0.248         | 0.305         | 0.283         |
| All Males Healthy vs. All Males Unhealthy       | 0.299 | 0.513         | 0.207         | 0.228         |
| All Females Unhealthy vs. All Males Unhealthy   | 0.948 | 0.719         | 0.288         | 0.877         |

Table 11:  $P$ -values for all strain and strain rate metrics. Results highlighted in green with bold text and \* indicates results which are statistically significant to  $p \leq 0.003$ .

| Planned Comparison                              | LVEF          | EDV              | ESV           | ESVi          | BSA           |
|-------------------------------------------------|---------------|------------------|---------------|---------------|---------------|
| Female Healthy 45-54 vs. Female Healthy 55-64   | 0.252         | <b>0.003*</b>    | 0.004         | 0.010         | 0.196         |
| Female Healthy 45-54 vs. Female Healthy 65-74   | 0.872         | <b>0.002*</b>    | 0.024         | 0.040         | 0.315         |
| Female Healthy 55-64 vs. Female Healthy 65-74   | 0.209         | 0.693            | 0.711         | 0.781         | 0.843         |
| Female Healthy 45-54 vs. Male Healthy 45-54     | 0.020         | <b>0.001*</b>    | <b>0.001*</b> | <b>0.001*</b> | <b>0.001*</b> |
| Female Healthy 55-64 vs. Male Healthy 55-64     | 0.005         | <b>0.001*</b>    | <b>0.001*</b> | <b>0.001*</b> | <b>0.001*</b> |
| Female Healthy 65-74 vs. Male Healthy 65-74     | 0.017         | <b>0.001*</b>    | <b>0.001*</b> | <b>0.001*</b> | <b>0.001*</b> |
| Male Healthy 45-54 vs. Male Healthy 55-64       | 0.755         | 0.005            | 0.150         | 0.053         | 0.048         |
| Male Healthy 45-54 vs. Male Healthy 65-74       | 0.516         | <b>1.00E-03*</b> | <b>0.003*</b> | 0.039         | <b>0.001*</b> |
| Male Healthy 55-64 vs. Male Healthy 65-74       | 0.357         | 0.070            | 0.392         | 0.701         | 0.071         |
| Male Healthy 65-74 vs. Male Unhealthy 65-74     | <b>0.001*</b> | 0.018            | <b>0.001*</b> | <b>0.001*</b> | 0.886         |
| Female Healthy 65-74 vs. Female Unhealthy 65-74 | 0.351         | 0.962            | 0.499         | 0.346         | 0.074         |
| Male Healthy 55-64 vs. Male Unhealthy 55-64     | 0.031         | 0.008            | 0.013         | 0.008         | 0.111         |
| Male Unhealthy 55-64 vs. Male Unhealthy 65-74   | 0.485         | 0.094            | 0.734         | 0.632         | 0.701         |
| All Males Healthy vs. All Females Healthy       | <b>0.001*</b> | <b>0.001*</b>    | <b>0.001*</b> | <b>0.001*</b> | <b>0.001*</b> |
| All Females Healthy vs. All Females Unhealthy   | 0.202         | 0.248            | 0.209         | 0.206         | 0.574         |
| All Males Healthy vs. All Males Unhealthy       | 0.044         | 0.151            | 0.074         | 0.052         | 0.004         |
| All Females Unhealthy vs. All Males Unhealthy   | 0.263         | <b>0.003*</b>    | 0.012         | 0.090         | <b>0.001*</b> |

Table 13: Age and BSA correlations with other variables of interest for all unhealthy females. Statistically significant  $p$ -values are highlighted in green. The 95% CIs are taken from the bootstrapping analysis.

| Variable | Age Correlations |         |            |         |        |
|----------|------------------|---------|------------|---------|--------|
|          | $n$              | Pearson | $p$ -value | 95% CIs |        |
|          |                  |         |            | Lower   | Upper  |
| EDV      | 18               | -0.49   | 0.039      | -0.790  | 0.012  |
| ESV      | 18               | -0.319  | 0.196      | -0.243  | -0.003 |
| LVEF     | 18               | 0.005   | 0.984      | -0.517  | 0.672  |
| ESVi     | 18               | -0.269  | 0.281      | -0.781  | 0.351  |
| ACS      | 20               | -0.187  | 0.431      | -0.682  | 0.390  |
| MCS      | 20               | -0.165  | 0.487      | -0.613  | 0.365  |
| BCS      | 20               | 0.093   | 0.697      | -0.149  | 0.506  |
| GCS      | 20               | -0.123  | 0.606      | -0.567  | 0.370  |
| Variable | BSA Correlations |         |            |         |        |
| EDV      | 18               | 0.428   | 0.076      | -0.148  | 0.721  |
| ESV      | 18               | 0.307   | 0.216      | 0.202   | 0.425  |
| LVEF     | 18               | -0.155  | 0.538      | -0.594  | 0.526  |
| ESVi     | 18               | 0.157   | 0.534      | -0.525  | 0.642  |
| ACS      | 18               | 0.113   | 0.656      | -0.358  | 0.470  |
| MCS      | 18               | 0.131   | 0.605      | -0.403  | 0.552  |
| BCS      | 18               | 0.053   | 0.834      | -0.477  | 0.471  |
| GCS      | 18               | 0.131   | 0.605      | -0.390  | 0.506  |



Table 14: Age and BSA correlations with other variables of interest for all healthy males. Statistically significant  $p$ -values are highlighted in green. The 95% CIs are taken from the bootstrapping analysis.

| Variable | Age Correlations |         |            |         |        |
|----------|------------------|---------|------------|---------|--------|
|          | $n$              | Pearson | $p$ -value | 95% CIs |        |
|          |                  |         |            | Lower   | Upper  |
| EDV      | 274              | -0.280  | 0.000      | -0.399  | -0.152 |
| ESV      | 274              | -0.192  | 0.001      | -0.316  | -0.063 |
| LVEF     | 274              | -0.047  | 0.439      | -0.171  | 0.082  |
| ESVi     | 274              | -0.133  | 0.028      | -0.249  | -0.003 |
| ACS      | 293              | -0.026  | 0.657      | -0.186  | 0.062  |
| MCS      | 293              | -0.160  | 0.006      | -0.308  | -0.072 |
| BCS      | 293              | -0.033  | 0.569      | -0.139  | 0.088  |
| GCS      | 293              | -0.048  | 0.411      | -0.201  | 0.050  |
| Variable | BSA Correlations |         |            |         |        |
| EDV      | 274              | 0.482   | 0.000      | 0.390   | 0.567  |
| ESV      | 274              | 0.395   | 0.000      | 0.293   | 0.484  |
| LVEF     | 274              | -0.049  | 0.420      | -0.168  | 0.070  |
| ESVi     | 274              | 0.100   | 0.097      | -0.012  | 0.207  |
| ACS      | 274              | 0.075   | 0.217      | -0.029  | 0.183  |
| MCS      | 274              | 0.170   | 0.005      | 0.049   | 0.283  |
| BCS      | 274              | 0.092   | 0.130      | -0.044  | 0.210  |
| GCS      | 274              | 0.108   | 0.074      | -0.008  | 0.226  |

Table 15: Age and BSA correlations with other variables of interest for all unhealthy males. Statistically significant  $p$ -values are highlighted in green. The 95% CIs are taken from the bootstrapping analysis.

| Variable | Age Correlations |         |            |         |        |
|----------|------------------|---------|------------|---------|--------|
|          | $n$              | Pearson | $p$ -value | 95% CIs |        |
|          |                  |         |            | Lower   | Upper  |
| EDV      | 101              | -0.114  | 0.256      | -0.315  | 0.065  |
| ESV      | 101              | 0.049   | 0.626      | -0.159  | 0.200  |
| LVEF     | 101              | -0.204  | 0.041      | -0.374  | -0.026 |
| ESVi     | 101              | 0.048   | 0.632      | -0.151  | 0.215  |
| ACS      | 111              | 0.089   | 0.351      | -0.049  | 0.339  |
| MCS      | 111              | 0.148   | 0.120      | -0.064  | 0.342  |
| BCS      | 111              | 0.020   | 0.835      | -0.131  | 0.192  |
| GCS      | 111              | 0.101   | 0.293      | -0.056  | 0.320  |
| Variable | BSA Correlations |         |            |         |        |
| EDV      | 101              | 0.312   | 0.001      | 0.138   | 0.471  |
| ESV      | 101              | 0.165   | 0.100      | -0.001  | 0.339  |
| LVEF     | 101              | 0.074   | 0.465      | -0.107  | 0.266  |
| ESVi     | 101              | -0.039  | 0.697      | -0.197  | 0.150  |
| ACS      | 101              | -0.169  | 0.092      | -0.342  | 0.013  |
| MCS      | 101              | -0.112  | 0.263      | -0.315  | 0.098  |
| BCS      | 101              | -0.128  | 0.201      | -0.329  | 0.091  |
| GCS      | 101              | -0.160  | 0.109      | -0.343  | 0.024  |

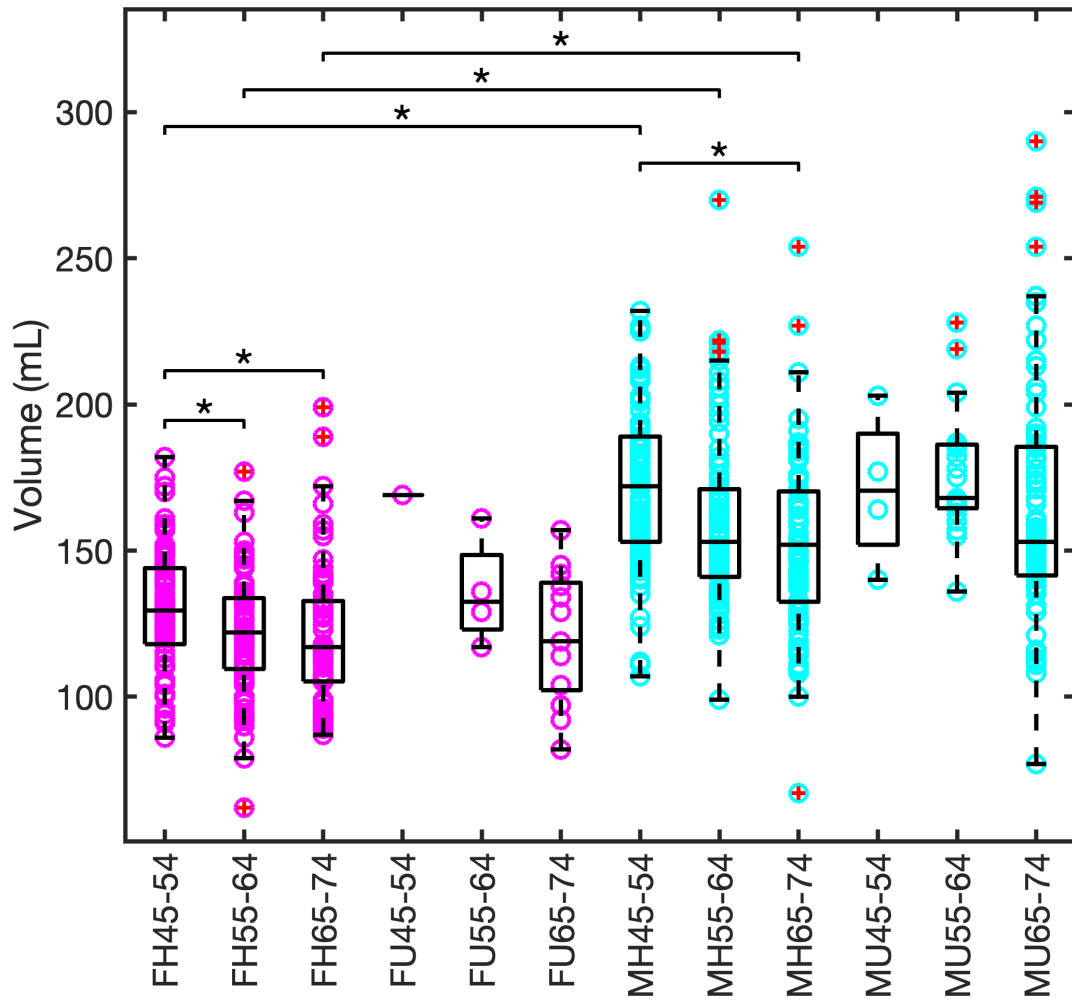

Figure 1: EDV boxplots for all groups: M = Male; F = Female; H = Healthy; U = Unhealthy; XX-YY = age range. Two further planned comparisons were statistically significant that could not be represented: all healthy females vs. all healthy males, and all unhealthy females vs. all unhealthy males.

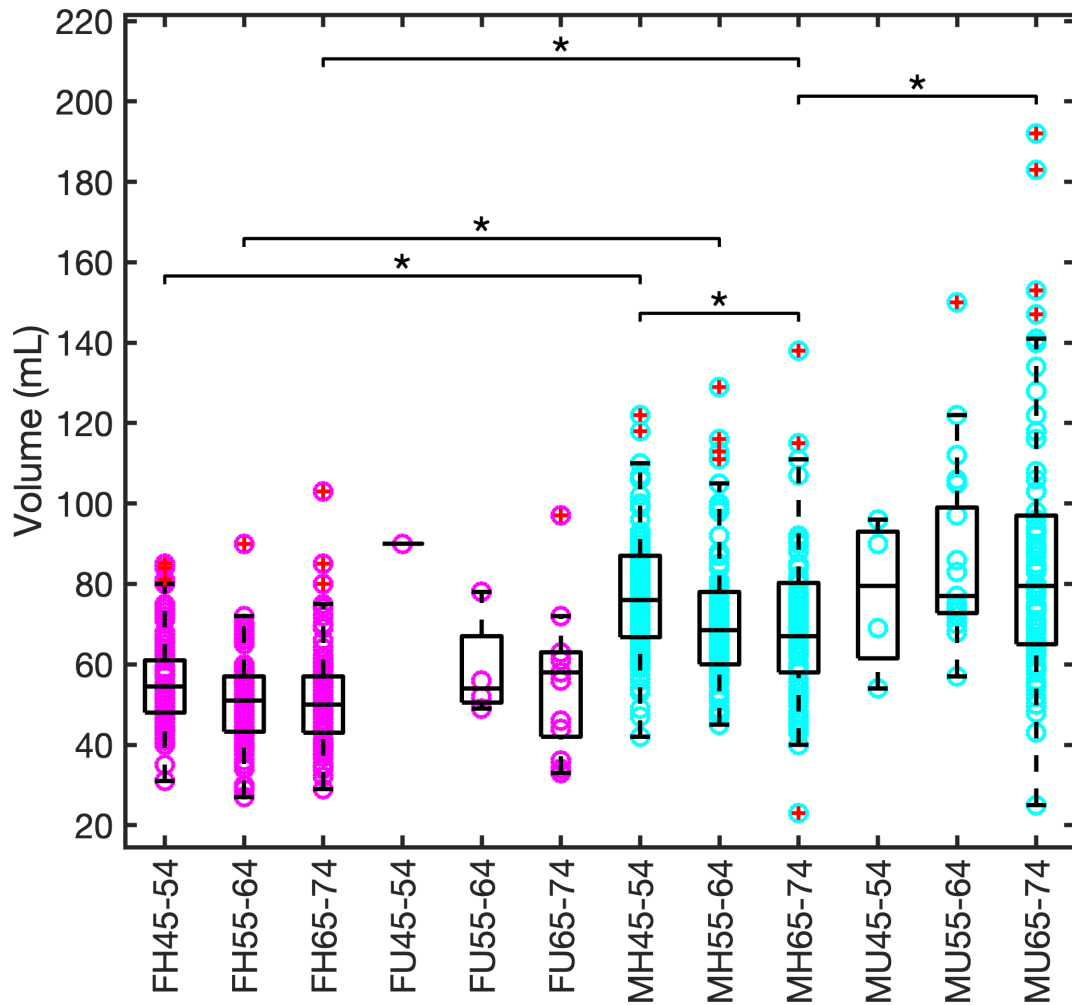

Figure 2: ESV boxplots for all groups: M = Male; F = Female; H = Healthy; U = Unhealthy; XX-YY = age range. One further planned comparison was statistically significant that could not be represented on this plot: all healthy females vs. all healthy males.

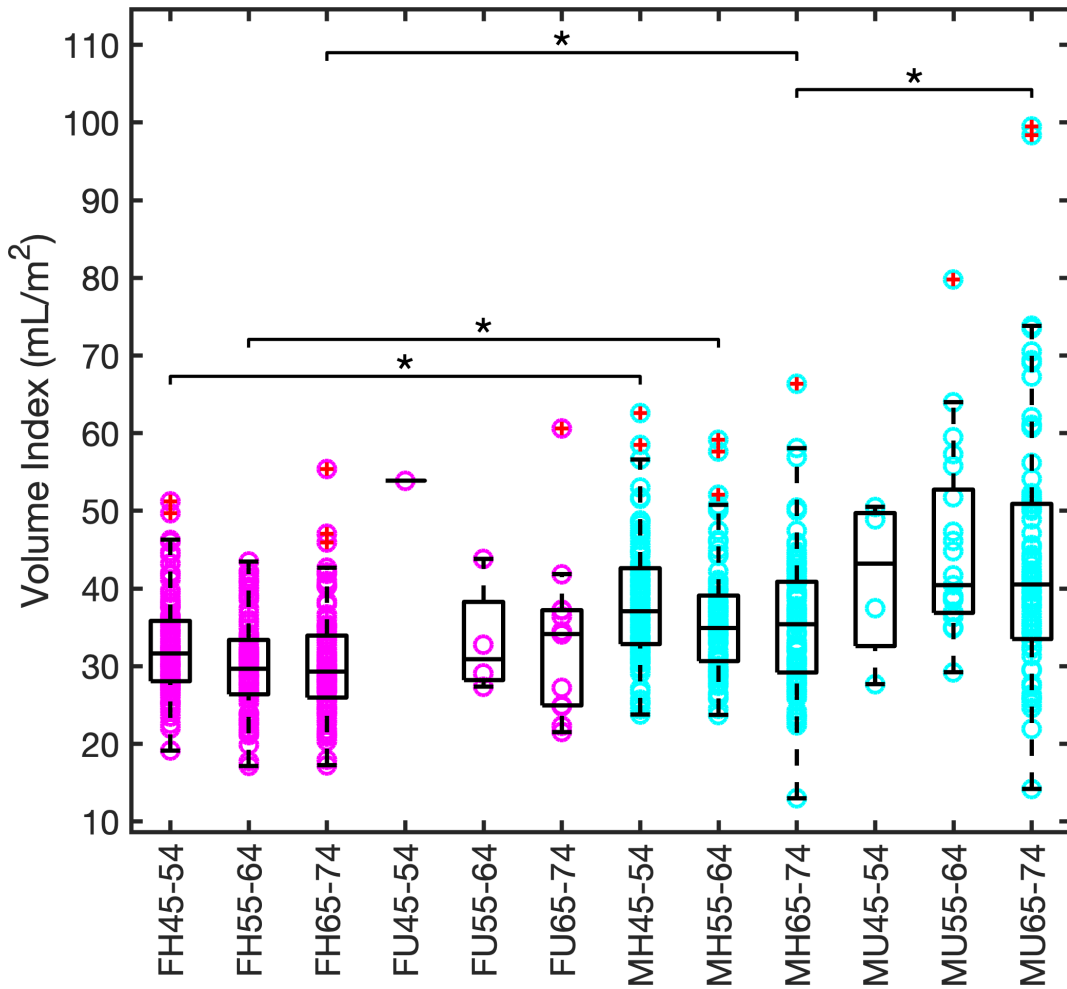

Figure 3: ESVi as boxplots for all groups: M = Male; F = Female; H = Healthy; U = Unhealthy; XX-YY = age range. One further planned comparison was statistically significant that could not be represented on this plot: all healthy females vs. all healthy males.

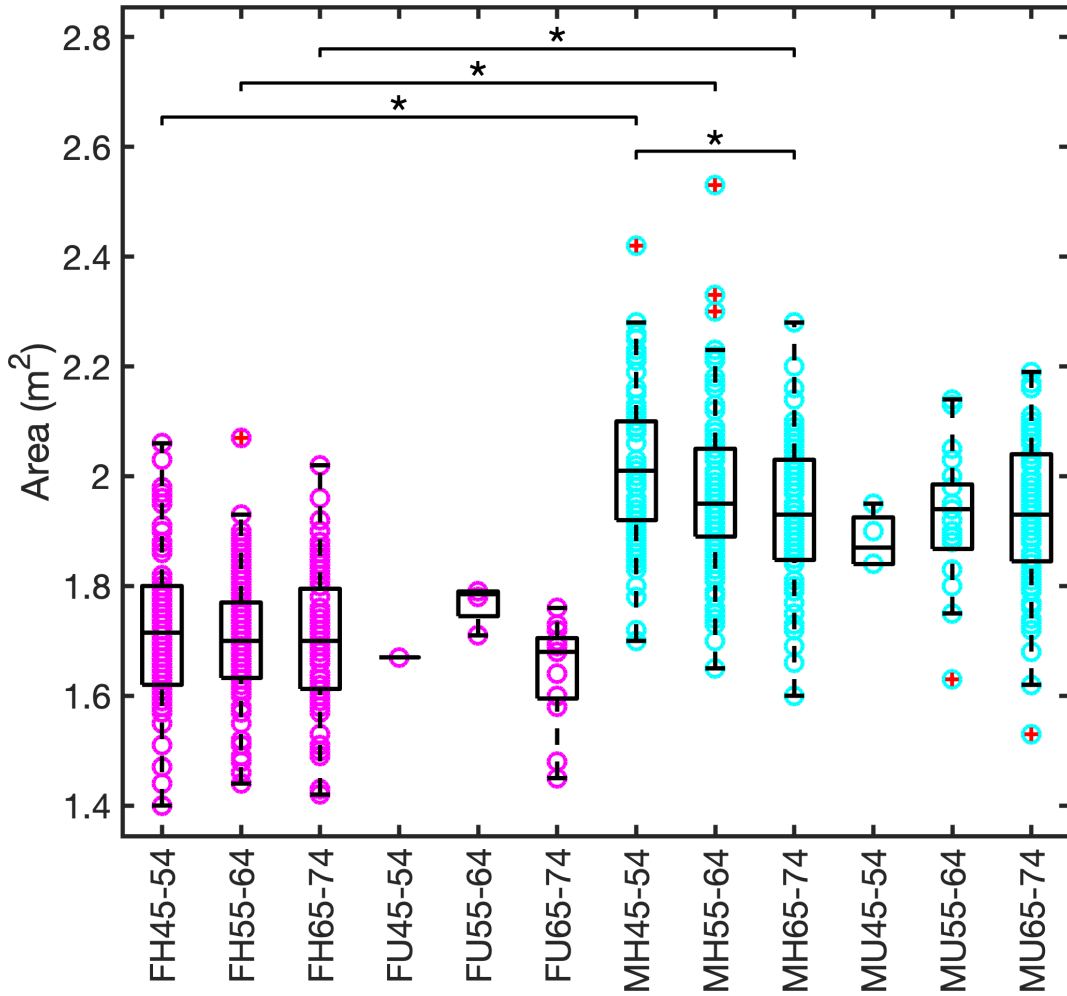

Figure 4: BSA as boxplots for all groups: M = Male; F = Female; H = Healthy; U = Unhealthy; XX-YY = age range. Two further planned comparisons were statistically significant that could not be represented on this plot: all healthy females vs. all healthy males, and all unhealthy females vs. all unhealthy males.

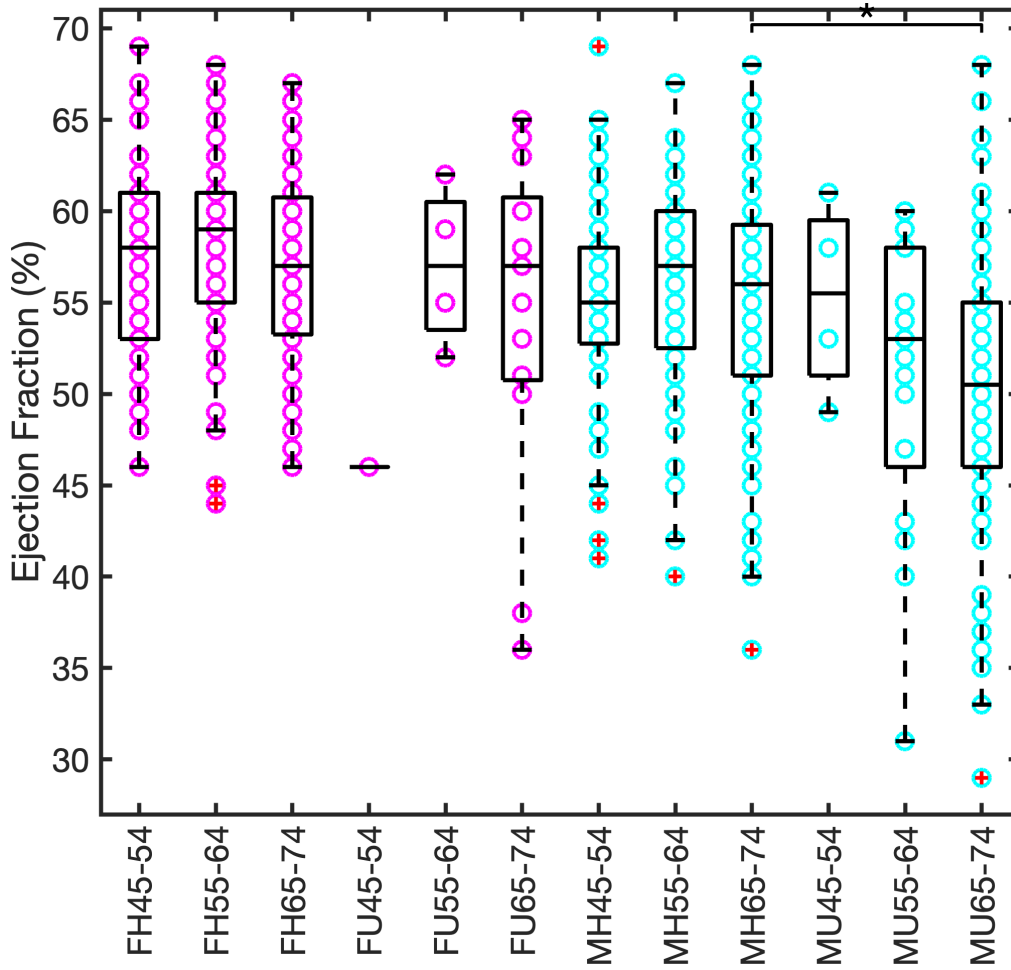

Figure 5: LVEF boxplots for all groups: M = Male; F = Female; H = Healthy; U = Unhealthy; XX-YY = age range. One further planned comparison was statistically significant that cannot be represented on this plot: all healthy females vs. all healthy males.
